# Supplementary material for: Diagnosis of Pneumonia by Cough Sounds Analyzed with Statistical Features and AI
Source: MDPI journal article supplement (doi:10.3390/s21217036), 2021-10-23
Supplement: s1 [file s1]

**Title:** Diagnosis of pneumonia by cough sounds analyzed with statistical feature and AI

**Author:** Youngbeen Chung<sup>1</sup>, Jie Jin<sup>5</sup>, Hyun In Jo<sup>2</sup>, Hyun Lee<sup>3</sup>, Sang-Heon Kim<sup>3\*</sup>, Sung Jun Chung<sup>3</sup>, Ho Joo Yoon<sup>3</sup>, Junhong Park<sup>1\*\*</sup>, Jin Yong Jeon<sup>4</sup>

<sup>1</sup> Department of Mechanical Engineering, Hanyang University, Wangsimni-ro 222, Seongdong-Gu, Seoul 04763, Republic of Korea

<sup>2</sup> Department of Architectural Engineering, Hanyang University, Wangsimni-ro 222, Seongdong-Gu, Seoul 04763, Republic of Korea

<sup>3</sup> Department of Internal Medicine, Hanyang University Hospital, Hanyang University College of Medicine, 222 Wangsimri-ro, Seongdong-gu, Seoul 04763, Republic of Korea

<sup>4</sup> Department of Medical and Digital Engineering, Hanyang University, Wangsimni-ro 222, Seongdong-Gu, Seoul 04763, Republic of Korea

<sup>5</sup> School of Electromechanical and Automotive Engineering, Yantai University, 30 Qingquan Road, Laishan District, Yantai, 264005, PR China

**Corresponding author:**

\* Sang-Heon Kim: Department of Internal Medicine, Hanyang University College of Medicine, 222 Wangsimni-ro, Seongdong-gu, Seoul 04763, Republic of Korea

Tel: +82-02-2290-8336, Fax: +82-02-2298-9183, E-mail: sangheonkim@hanyang.ac.kr

\*\* Junhong Park: Department of Mechanical Engineering, Hanyang University, 222 Wangsimni-ro, Seongdong-gu, Seoul 04673, Republic of Korea

Tel: +82-02-2220-0424, Fax: +82-02-2298-4634, E-mail: parkj@hanyang.ac.kr

**Supplementary material:**

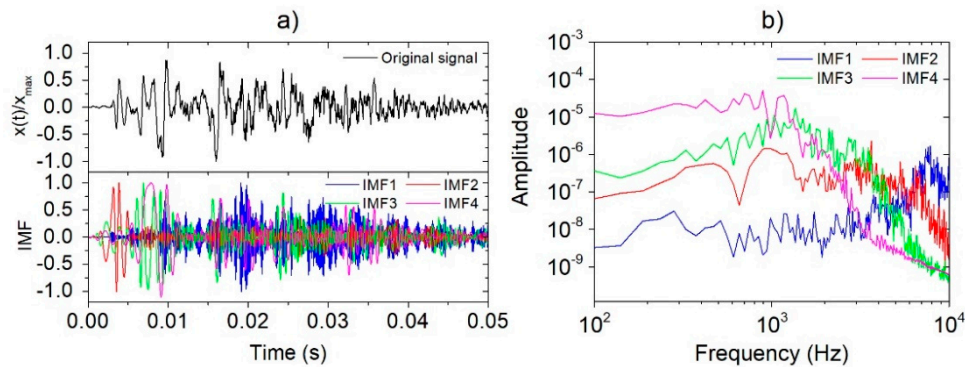

Supplementary Figure S1. Analysis of frequency ranges by components of cough sounds: a) IMF extraction according to frequency ranges with EMD method applied; b) peak frequency by power spectrum of each IMF.
